# Supplementary material for: Highly efficient Cr( vi ) removal from water using deep eutectic solvents: a sustainable and comprehensive approach
Source: Royal Society of Chemistry journal article supplement (doi:10.1039/d5ra08693k), 2026-01-01
Supplement: d5ra08693k1.pdf [file d5ra08693k1.pdf]

## ELECTRONIC SUPPORTING INFORMATION

### Highly Efficient Cr(VI) Removal from Water Using Deep Eutectic Solvents: A Sustainable and Comprehensive Approach

Thi Nhan Huynh<sup>a,b</sup>, Duc Thien Nguyen<sup>a</sup>, Ho Hoang Phuong Uyen Pham<sup>a</sup>, Anh Duc Trinh<sup>b</sup>, Quang Hieu Tran<sup>c\*</sup>

<sup>a</sup>*Faculty of Chemistry, Ho Chi Minh City University of Education, 280 An Duong Vuong, Cho Quan Ward, Ho Chi Minh City, 700000, Vietnam.*

<sup>b</sup>*Nuclear Training Center, Vietnam Atomic Energy Institute, Hanoi 100000 Vietnam*

<sup>c</sup>*Faculty of Chemical Engineering, Industrial University of Ho Chi Minh City, 12 Nguyen Van Bao, Hanh Thong Ward, Ho Chi Minh City, 700000, Vietnam,*

*\*Email : [tg61550280@iuh.edu.vn](mailto:tg61550280@iuh.edu.vn), [hieugodau78@gmail.com](mailto:hieugodau78@gmail.com)*

## TABLE CONTENTS

**Table S1.** Selected physical properties of the deep eutectic solvents (DESs) prepared with a 1:4 HBA:HBD molar ratio

**Table S2.** Chemical shift assignments for HBA, HBD, and DES

**Table S3.** Absorbance measurements of Cr(VI) standard solutions at 540 nm (Water Matrix)

**Table S4.** Absorbance measurements of Cr(VI) standard solutions at 540 nm (HDES Matrix)

**Table S5.** Effect of temperature on EE %

**Figure S1.** TGA of HDES 4

**Figure S2.** DSC of HDES 4

**Figure S3.** Analytical Greeness Report sheet

**Table S1.** Selected physical properties of the deep eutectic solvents (DESs) prepared with a 1:4 HBA:HBD molar ratio (n=3).

| HBA     | HBD                                | Appearance | pH            | Density (g/mL)    |
|---------|------------------------------------|------------|---------------|-------------------|
| N8888Br | HCOOH                              | Colourless | $1.1 \pm 0.1$ | $1.107 \pm 0.003$ |
|         | CH <sub>3</sub> COOH               | Yellowish  | $2.3 \pm 0.2$ | $0.955 \pm 0.005$ |
|         | C <sub>2</sub> H <sub>5</sub> COOH | Colourless | $4.2 \pm 0.2$ | $0.998 \pm 0.002$ |
|         | C <sub>2</sub> H <sub>5</sub> OH   | Colourless | $6.8 \pm 0.4$ | $0.885 \pm 0.004$ |

**Table S2.** Chemical shift assignments for HBA, HBD, and DES

| Compound   | Functional group    | Chemical shift (ppm)                 | Explanation                                                                                                                    |
|------------|---------------------|--------------------------------------|--------------------------------------------------------------------------------------------------------------------------------|
| <b>HBA</b> | CH <sub>3</sub> (a) | 3H, triplet, $\delta = 0.871$ ppm    | Protons of the terminal methyl group in the alkyl chain.                                                                       |
|            | CH <sub>2</sub> (b) | 10H, quartet, $\delta = 1.277$ ppm): | Protons of the methylene groups within the alkyl chain.                                                                        |
|            | CH <sub>2</sub> (c) | 1.583                                | Protons of the methylene group adjacent to the nitrogen atom.                                                                  |
|            | CH <sub>2</sub> (d) | 2H, triplet, $\delta = 3.184$ ppm    | Protons of the methylene group adjacent to the nitrogen atom, significantly influenced by the positive charge on the nitrogen. |
| <b>HBD</b> | CH <sub>3</sub>     | 3H (singlet, 1.91 ppm):              | Protons of the methyl group adjacent to the carbonyl group.                                                                    |
|            | COOH                | 1H singlet, 11.913 ppm               | Proton of the carboxyl group. This position is typically broad and may vary depending on the solvent and                       |

|               |                            |                                                                                                        |                                                                                                                       |
|---------------|----------------------------|--------------------------------------------------------------------------------------------------------|-----------------------------------------------------------------------------------------------------------------------|
|               |                            |                                                                                                        | concentration.                                                                                                        |
| <b>HDES 4</b> | CH <sub>3</sub> (from HBA) | 3H, triplet, $\delta = 0,870$ ppm                                                                      | Similar to HBA                                                                                                        |
|               | CH <sub>2</sub> (from HBA) | 10H, multiplet, $\delta = 1.280$ ppm: 5 methylene (CH <sub>2</sub> ) groups of the HBA                 | Similar to HBA                                                                                                        |
|               | CH <sub>2</sub> (from HBA) | 2H, singlet, $\delta = 1.573$ ppm: 1 methylene (CH <sub>2</sub> ) group of the HBA.                    | Similar to HBA                                                                                                        |
|               | CH <sub>2</sub> (from HBA) | 2H, triplet, $\delta = 3.173$ ppm: methylene group adjacent to the electronegative nitrogen of the HBA | Similar to HBA                                                                                                        |
|               | CH <sub>3</sub> (from HBD) | 3H, singlet, $\delta = 1.908$ ppm: methyl group of the HBD.                                            | Similar to HBD                                                                                                        |
|               | COOH (from HBD)            | 1H, singlet, $\delta = 11.921$ ppm (downfield): labile proton of the carboxylic acid group in the HBD. | This position may shift significantly compared to neat acetic acid due to hydrogen bonding interactions with the HBA. |

**Table S3.** Absorbance measurements of Cr(VI) standard solutions at 540 nm (Water Matrix)

| Conc.Cr(VI)<br>(mg/L) | Abs 1<br>(a.u)        | Abs 2<br>(a.u) | Abs 3<br>(a.u) | Mean   | SD     |
|-----------------------|-----------------------|----------------|----------------|--------|--------|
| 0.1                   | 0.0791                | 0.0783         | 0.0793         | 0.0789 | 0.0005 |
| 0.25                  | 0.1962                | 0.1903         | 0.1893         | 0.1920 | 0.0037 |
| 0.5                   | 0.2810                | 0.2791         | 0.2901         | 0.2834 | 0.0059 |
| 0.75                  | 0.4527                | 0.4412         | 0.4531         | 0.4490 | 0.0067 |
| 1                     | 0.5893                | 0.5902         | 0.5821         | 0.5872 | 0.0044 |
| Slope                 | $0.56606 \pm 0.02061$ |                |                |        |        |
| Intercepts            | $0.02266 \pm 0.0035$  |                |                |        |        |
| R <sup>2</sup>        | 0.9992                |                |                |        |        |
| LOD                   | $0.0297 \pm 0.001$    |                |                |        |        |

|     |                    |
|-----|--------------------|
| LOQ | $0.0993 \pm 0.004$ |
|-----|--------------------|

**Table S4.** Absorbance measurements of Cr(VI) standard solutions at 540 nm (HDES Matrix)

| Conc.Cr(VI)<br>(mg/L) | Abs 1<br>(a.u)        | Abs 2<br>(a.u) | Abs 3<br>(a.u) | Mean   | SD     |
|-----------------------|-----------------------|----------------|----------------|--------|--------|
| 0.1                   | 0.0795                | 0.0783         | 0.0801         | 0.0793 | 0.0009 |
| 0.25                  | 0.1492                | 0.1501         | 0.1462         | 0.1485 | 0.0021 |
| 0.5                   | 0.2636                | 0.2519         | 0.2662         | 0.2606 | 0.0076 |
| 0.75                  | 0.3826                | 0.4189         | 0.3891         | 0.3969 | 0.0193 |
| 1                     | 0.4755                | 0.4812         | 0.4593         | 0.4720 | 0.0114 |
| Slope                 | $0.44565 \pm 0.00688$ |                |                |        |        |
| Intercepts            | $0.03511 \pm 0.00139$ |                |                |        |        |
| R <sup>2</sup>        | 0.9960                |                |                |        |        |
| LOD                   | $0.0378 \pm 0.001$    |                |                |        |        |
| LOQ                   | $0.1258 \pm 0.002$    |                |                |        |        |

**Table S5.** Effect of temperature on EE %

| Temperature | C <sub>i</sub> (mg/L) | C <sub>p</sub> (mg/L) | EE %           |
|-------------|-----------------------|-----------------------|----------------|
| 30 °C       | 250                   | $26.4 \pm 1.8$        | $89.4 \pm 1.8$ |
| 40 °C       | 250                   | $2.0 \pm 0.2$         | $99.2 \pm 1.6$ |
| 50 °C       | 250                   | $1.7 \pm 0.1$         | $99.3 \pm 2.3$ |

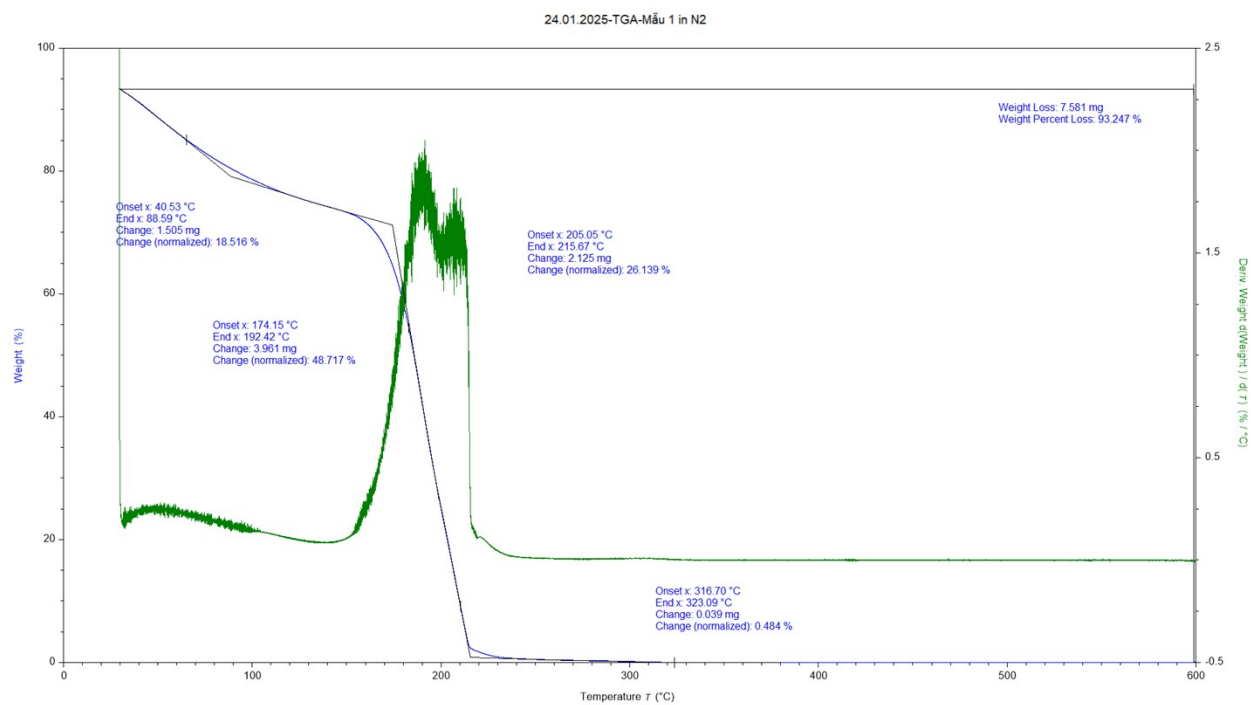

**Figure S1.** TGA of HDES 4

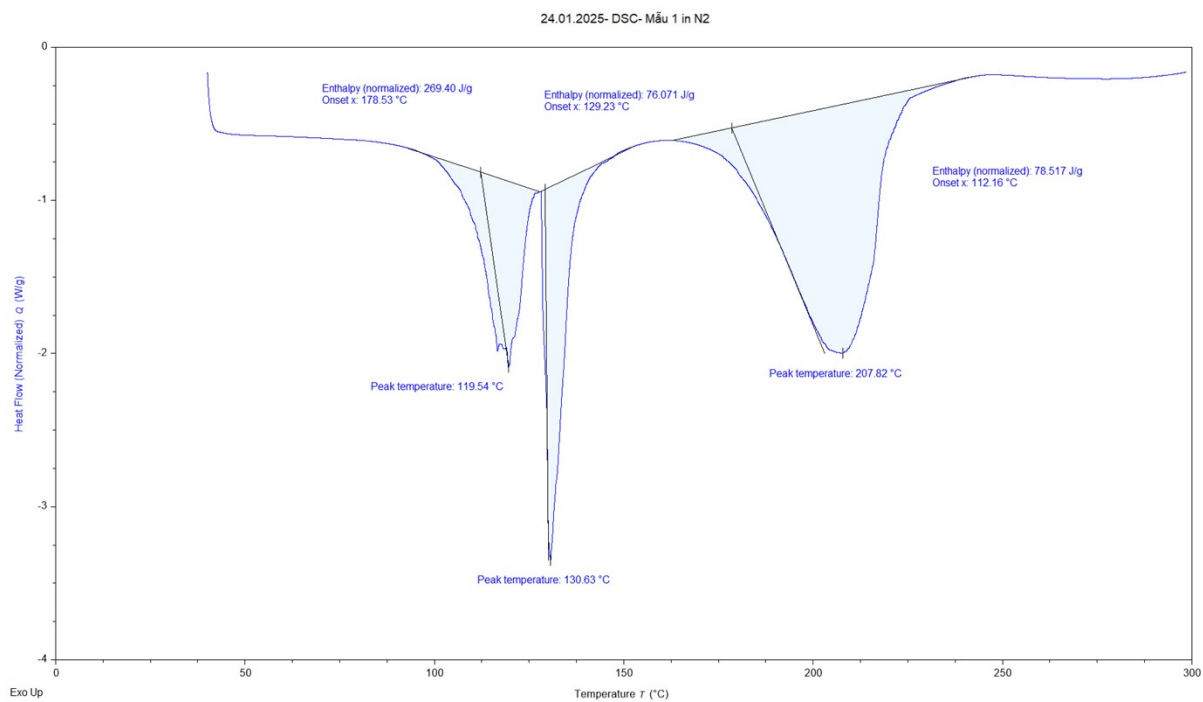

**Figure S2.** DSC of HDES 4

## Analytical Greenness report sheet

23/06/2025 16:56:54

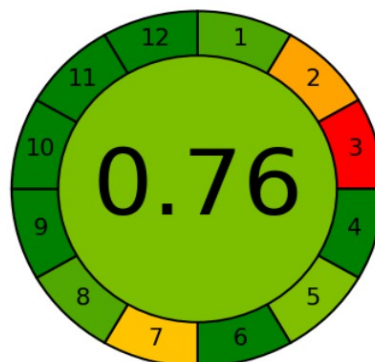

| Criteria                                                                                                                             | Score | Weight |
|--------------------------------------------------------------------------------------------------------------------------------------|-------|--------|
| 1. Direct analytical techniques should be applied to avoid sample treatment.                                                         | 0.85  | 2      |
| 2. Minimal sample size and minimal number of samples are goals.                                                                      | 0.32  | 2      |
| 3. If possible, measurements should be performed in situ.                                                                            | 0.0   | 2      |
| 4. Integration of analytical processes and operations saves energy and reduces the use of reagents.                                  | 1.0   | 2      |
| 5. Automated and miniaturized methods should be selected.                                                                            | 0.75  | 2      |
| 6. Derivatization should be avoided.                                                                                                 | 1.0   | 2      |
| 7. Generation of a large volume of analytical waste should be avoided, and proper management of analytical waste should be provided. | 0.39  | 2      |
| 8. Multi-analyte or multi-parameter methods are preferred versus methods using one analyte at a time.                                | 0.84  | 2      |
| 9. The use of energy should be minimized.                                                                                            | 1.0   | 2      |
| 10. Reagents obtained from renewable sources should be preferred.                                                                    | 1.0   | 2      |
| 11. Toxic reagents should be eliminated or replaced.                                                                                 | 1.0   | 2      |
| 12. Operator's safety should be increased.                                                                                           | 1.0   | 2      |

**Figure S3.** Analytical Greenness Report sheet
